# Supplementary material
Source: publisher site journal article supplement (https://www.spandidos-publications.com/5116/downloadSupplementary)
Supplement: Supplementary file 1 [file downloadSupplementary]

## Sheet: Table S19
Table SXIX. The P-value of DNase genes expression and RNAss.
Cancer type	DNASE1	DNASE1L1	DNASE1L2	DNASE1L3	DNASE2	DNASE2B
ACC	0.537132	0.558164	0.00628491	0.00253259	0.412756	0.625343
BLCA	0.953327	8.77324e-05	0.00351335	5.20712e-05	0.369584	0.036481
BRCA	5.62535e-06	7.10653e-05	0.000228787	3.92921e-47	5.0719e-07	4.49782e-15
CESC	0.00464822	0.000898162	0.481426	0.079764	0.346019	0.501956
CHOL	0.293893	0.0440421	0.979087	0.695031	0.285552	0.8833
COAD	1.42728e-05	1.12326e-07	0.488156	0.00495298	0.0378903	0.0286926
DLBC	0.107302	0.00129368	0.000931407	0.00920954	0.174672	0.0467396
ESCA	0.605022	0.673807	0.287997	0.0839441	0.763402	0.251613
GBM	0.193189	1.28502e-10	0.0189336	0.328914	1.99556e-06	0.0560537
HNSC	2.16199e-07	1.11077e-14	0.0136904	0.23131	0.018997	8.09787e-07
KICH	0.946163	0.0260834	0.00283201	0.0350987	0.302732	0.292781
KIRC	0.0615421	0.0541822	0.000367998	7.88935e-16	1.30667e-10	0.169807
KIRP	6.54632e-08	0.0717831	0.876234	0.464954	0.778574	0.00718534
LAML	0.549856	3.28e-08	0.477556	0.751926	1.82052e-09	0.135652
LGG	0.00239528	0	0.0542941	0.760423	0	1.55925e-21
LIHC	0.493757	3.26891e-07	0.12379	5.21042e-13	0.682789	0.0827901
LUAD	0.0327192	0.00743455	0.108612	9.46607e-13	6.84793e-05	3.33396e-20
LUSC	0.375606	0	0.605789	0.300025	0.0223277	5.83565e-09
MESO	0.373047	0.907968	0.00384906	0.144835	0.0616385	0.835489
OV	0.0878588	0.0165756	0.176183	0.00114631	5.51293e-06	0.0863689
PAAD	0.456559	0.0106199	0.0337739	0.00246866	0.480295	0.00756455
PCPG	4.78929e-05	0.0107203	0.0377755	1.40876e-06	0.00047061	0.790315
PRAD	0.0130833	1.67874e-06	0.0989079	0	1.34017e-08	2.84672e-05
READ	0.00255211	7.71232e-09	0.998201	0.650039	0.145566	0.69246
SARC	0.0158743	0.461358	0.000174776	0.00043098	0.000965139	0.149544
SKCM	0.26715	0.588276	0.0703152	1.13501e-05	0.00116789	0.598167
STAD	0.7219	0.710318	5.42232e-09	0.00397967	0.472024	0.0117334
TGCT	0	0	0.220019	0.736162	2.26983e-05	0.0792357
THCA	0.00267711	0.218315	1.03585e-10	0.194205	0	3.16245e-06
THYM	0.405832	4.3369e-06	0.00224161	0.000337323	5.06376e-05	0.122855
UCEC	0.000140901	0.597188	0.409306	3.12207e-09	1.35476e-09	0.693262
UCS	0.968587	0.625365	0.0473946	0.0205645	0.455275	0.507767
UVM	0.107788	0.448329	0.495737	0.00730152	0.135915	0.0033009
